# Supplementary material for: Step-by-step build-up of covalent poly(ethylene oxide) nanogel films
Source: Royal Society of Chemistry journal article supplement (doi:10.1039/c7nr05424f), 2017-01-01
Supplement: c7nr05424f1.pdf [file c7nr05424f1.pdf]

## Supporting Information

# Step-by-step build-up of covalent poly(ethylene oxide) nanogel films

*S.Zahouani,<sup>a,b</sup> L.Hurman,<sup>a</sup> M.De Giorgi,<sup>c</sup> C. Vigier-Carrière,<sup>d</sup> F. Boulmedais,<sup>d</sup> B. Senger,<sup>a,b</sup>  
B.Frisch,<sup>c</sup> P. Schaaf,<sup>a,b,d\*</sup> P. Lavallo,<sup>a,b,\*</sup> L. Jierry<sup>d</sup>*

a Institut National de la Santé et de la Recherche Médicale, INSERM Unité 1121, 11 rue  
Humann, 67085 Strasbourg Cedex, France

b Université de Strasbourg, Faculté de Chirurgie Dentaire, Fédération de Médecine  
Translationnelle de Strasbourg, Fédération Matériaux et Nanosciences d'Alsace, 67000  
Strasbourg, France

c Université de Strasbourg CNRS UMR 7199, Laboratoire de Conception et Application de  
Molécules, Faculté de Pharmacie, 74 route du Rhin, 67401 Illkirch Cedex, France

d Institut Charles Sadron, CNRS UPR 22, 23 rue du loëss, 67034 Strasbourg Cedex, France

| Build-up process type | Substrate        | Anchoring layer          | <F3> anchoring layer (Hz) | SH-component             | Mal-component            |
|-----------------------|------------------|--------------------------|---------------------------|--------------------------|--------------------------|
| A                     | Au               | Tetra <sub>112</sub> -SH | -56.6                     | Tetra <sub>112</sub> -SH | Tetra <sub>52</sub> -Mal |
| B                     | Au               | Bis <sub>5</sub> -SH     | -4.6                      | Tetra <sub>112</sub> -SH | Tetra <sub>52</sub> -Mal |
| C                     | Au               | Bis <sub>5</sub> -SH     | -4.6                      | Bis <sub>5</sub> -SH     | Tetra <sub>52</sub> -Mal |
| C                     | Au               | PEI                      | -25.0                     | Bis <sub>5</sub> -SH     | Tetra <sub>52</sub> -Mal |
| C                     | SiO <sub>2</sub> | PEI                      | -9.7                      | Bis <sub>5</sub> -SH     | Tetra <sub>52</sub> -Mal |
| C                     | PDMS             | PEI                      | -18.8                     | Bis <sub>5</sub> -SH     | Tetra <sub>52</sub> -Mal |
| C                     | Au               | SH-PEG-NH <sub>2</sub>   | -32.5                     | Bis <sub>5</sub> -SH     | Tetra <sub>52</sub> -Mal |
| C                     | Au               | Bis <sub>43</sub> -SH    | -52.0                     | Bis <sub>5</sub> -SH     | Tetra <sub>52</sub> -Mal |
| C                     | Au               | Bis <sub>43</sub> -SH    | -52.0                     | Bis <sub>43</sub> -SH    | Tetra <sub>52</sub> -Mal |

**Table S1.** Summary of the different build-up conditions studied.

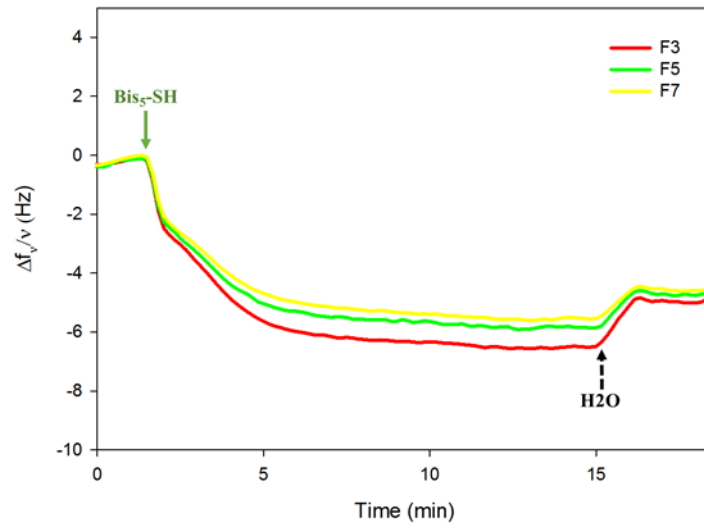

**Figure S1.** Evolution of the normalized frequency  $\Delta f_v/v$  (for harmonics  $v = 3, 5$  and  $7$ ) as a function of time with Bis<sub>5</sub>-SH deposition. Bis<sub>5</sub>-SH was used at a concentration of  $10^{-2}$  M ( $3.25 \text{ mg}\cdot\text{mL}^{-1}$ ).

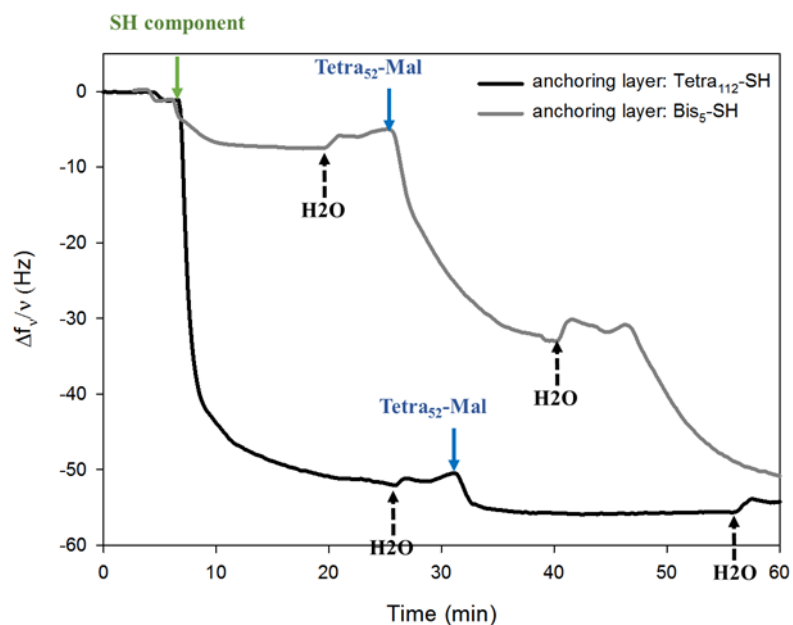

**Figure S2.** Evolution of the normalized frequency  $\Delta f_v/v$  (for  $v = 3$ ) as a function of time when either Bis<sub>5</sub>-SH or Tetra<sub>112</sub>-SH was deposited as a precursor layer and then a subsequent Tetra<sub>52</sub>-Mal was injected. Bis<sub>5</sub>-SH solution was used at a concentration of 3.25 mg.mL<sup>-1</sup>, Tetra<sub>112</sub>-SH and Tetra<sub>52</sub>-Mal at a concentration of 5 mg.mL<sup>-1</sup>.

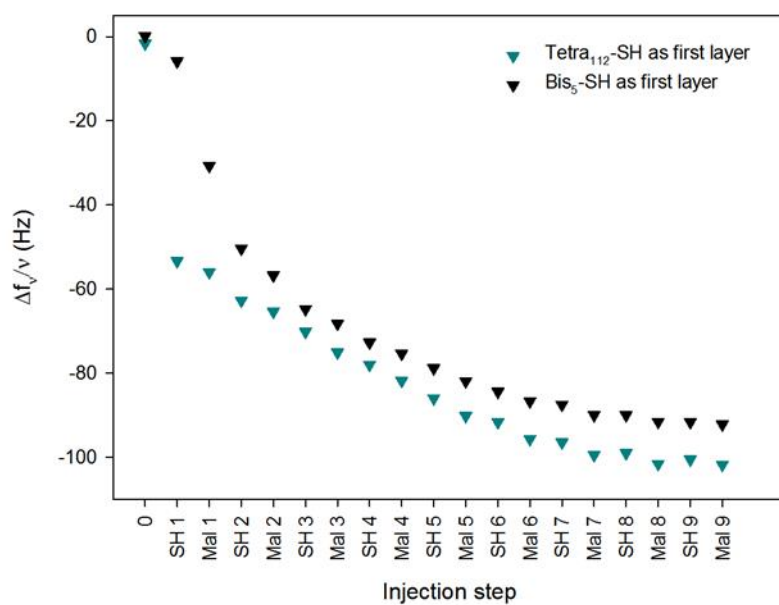

**Figure S3.** Evolution of the normalized frequency  $\Delta f_v/v$  (for  $v = 3$ ) as a function of injection step for a Tetra<sub>112</sub>-SH/Tetra<sub>52</sub>-Mal step-by-step build-up (with both solutions at 5 mg.mL<sup>-1</sup>). The build-up processes on gold substrates start with a precursor layer of Tetra<sub>112</sub>-SH or Bis<sub>5</sub>-SH.

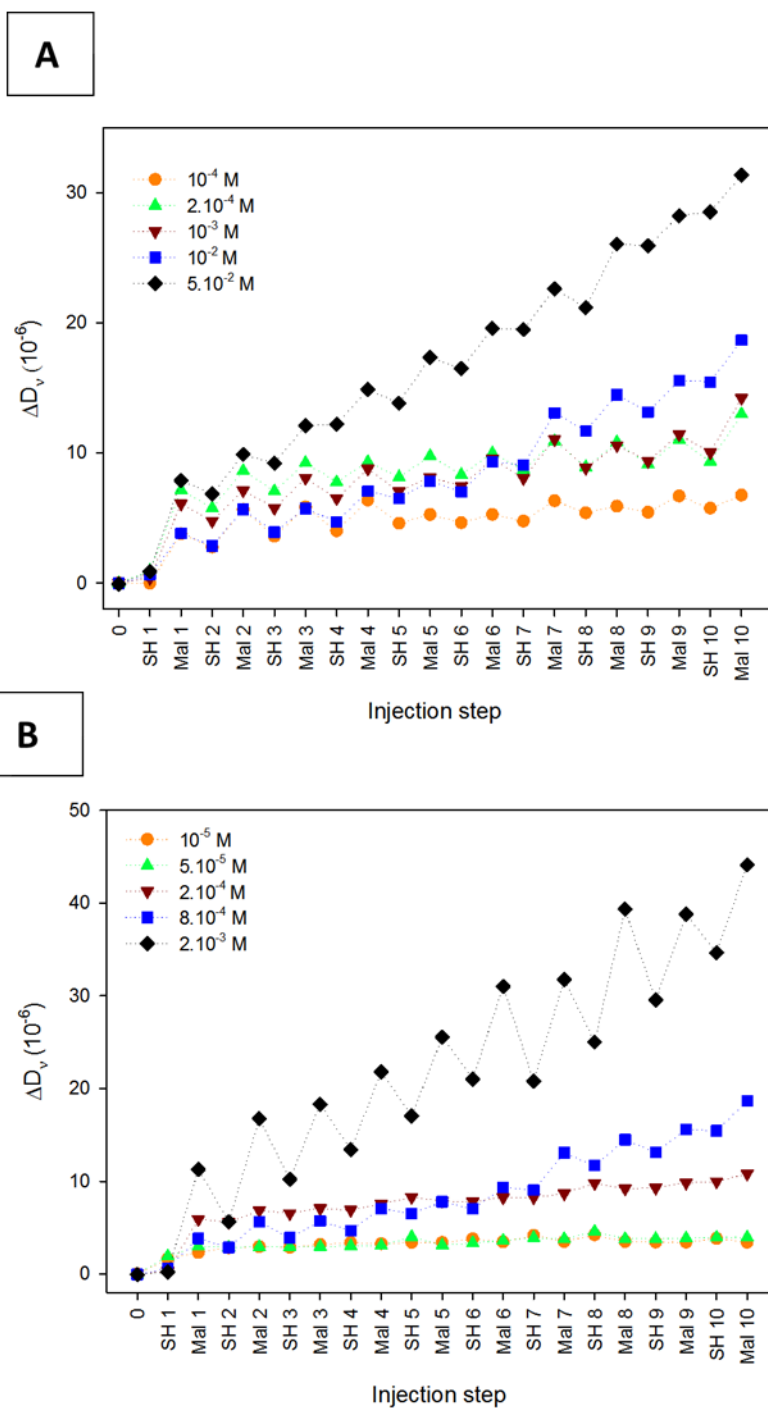

**Figure S4.** Evolution of the dissipation  $\Delta D_v$  (for  $v = 3$ ) as a function of injection step for a Bis<sub>5</sub>-SH/Tetra<sub>52</sub>-Mal step-by-step build-up. Concentrations of Bis<sub>5</sub>-SH was varied from  $10^{-4}$  M to  $5 \cdot 10^{-2}$  M ( $0.0325 \text{ mg} \cdot \text{mL}^{-1}$  to  $16.25 \text{ mg} \cdot \text{mL}^{-1}$ ) and concentration of Tetra<sub>52</sub>-Mal was maintained constant at  $8 \cdot 10^{-4}$  M ( $8 \text{ mg} \cdot \text{mL}^{-1}$ ) (A). Concentration of Bis<sub>5</sub>-SH was maintained constant at  $10^{-2}$  M ( $3.25 \text{ mg} \cdot \text{mL}^{-1}$ ) and concentration of Tetra<sub>52</sub>-Mal was varied from  $10^{-5}$  M to  $2 \cdot 10^{-3}$  M ( $0.1$  to  $20 \text{ mg} \cdot \text{mL}^{-1}$ ) (B).

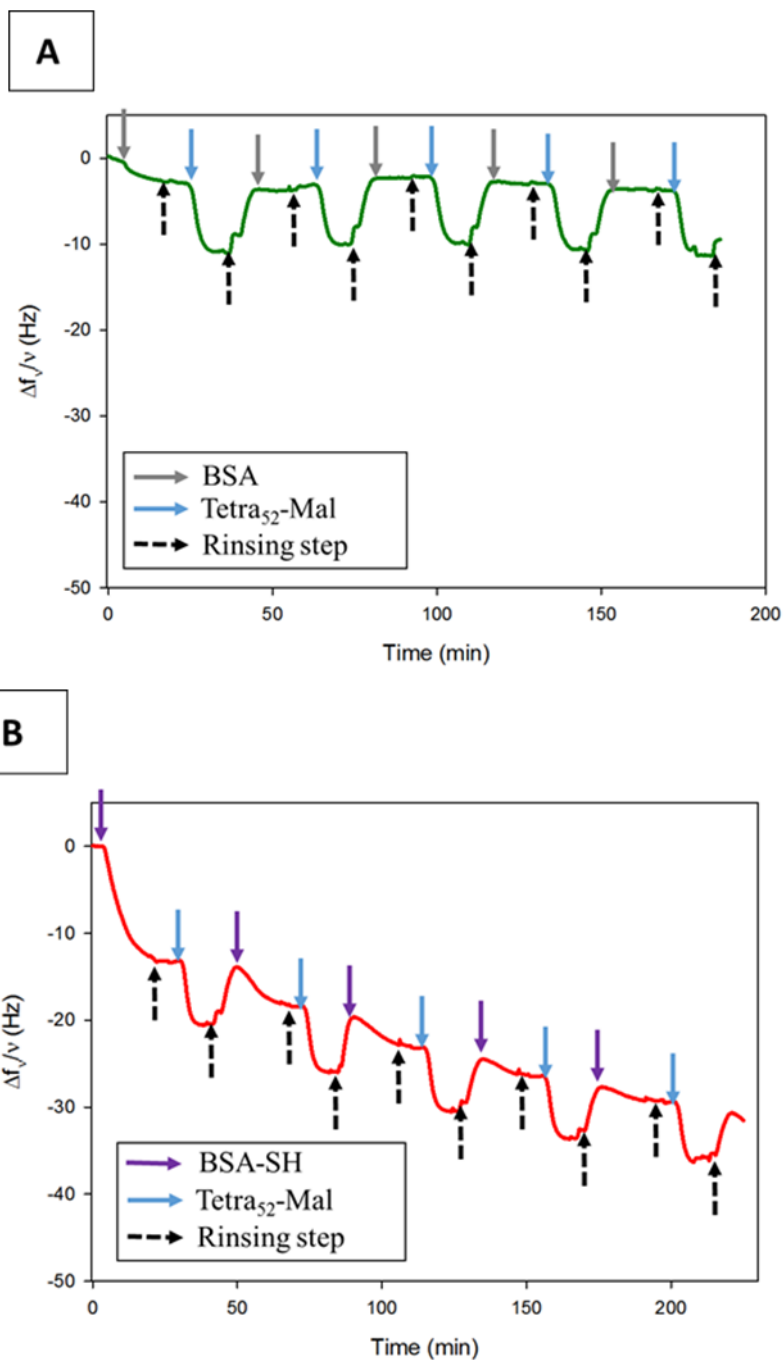

**Figure S5.** Evolution of the normalized frequency  $\Delta f_v/v$  (for  $v = 3$ ) as a function of time during BSA/Tetra<sub>52</sub>-Mal (A) or BSA-SH/Tetra<sub>52</sub>-Mal (B) step-by-step build-up processes. Tetra<sub>52</sub>-Mal was introduced at  $8 \text{ mg}\cdot\text{mL}^{-1}$  ( $8\cdot 10^{-4} \text{ M}$ ) and BSA or BSA-SH were used at a concentration of  $0.3 \text{ mg}\cdot\text{mL}^{-1}$  ( $5\cdot 10^{-6} \text{ M}$ ).

## Preparation of Biotin-EO<sub>2</sub>-Mal

Biotin-EO<sub>2</sub>-Mal has been prepared in three steps from according to the synthetic pathway given below. Experimental processes for each step have been reported elsewhere in literature.

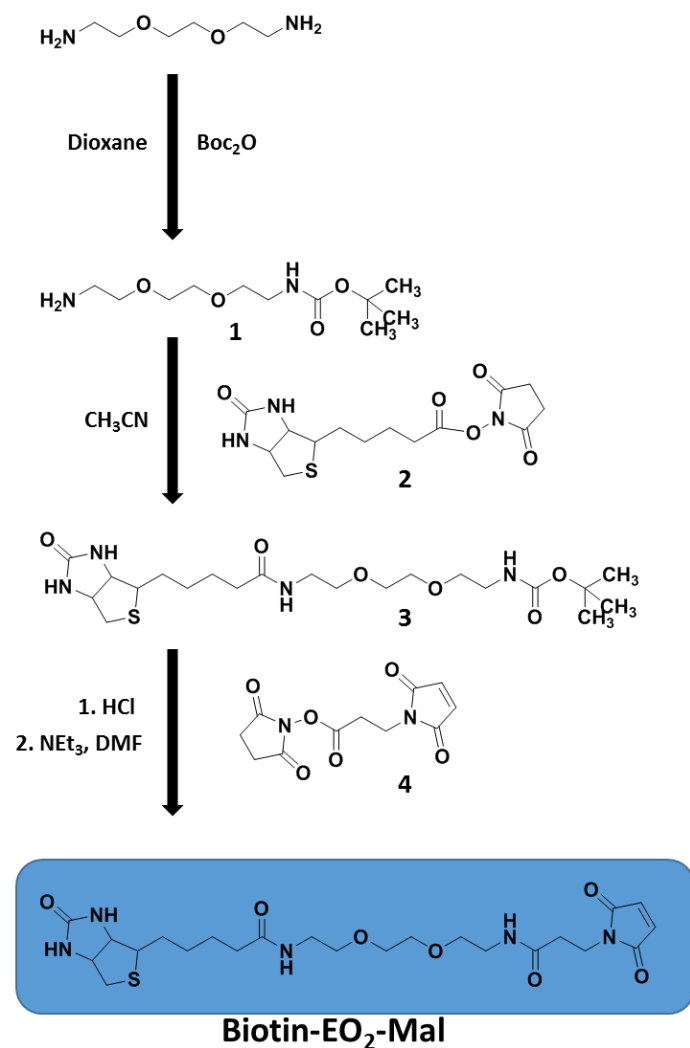

**Figure S6.** Synthesis of Biotin-EO<sub>2</sub>-Mal.

Commercially available 2,2'-(ethylenedioxy)bis(ethylamine) (ref.: 385505 from Aldrich) is monoprotected with Boc<sub>2</sub>O leading to compound **1** (S. Takayoshi et al., *Bioorganic & Medicinal Chemistry Letters*, **2007**, 17(15), 4208-4212). Then this later is brought in contact with



activated biotin **2** (ref.: RL-1006 from Iris Biotech GmbH), yielding to **3** (J. Davila et al., *Langmuir*, **2013**, 29(24), 7488-7498. Characterization of compound **3** was similar to the reported one: L. Myung-Ryul et al., *Organic Letters*, **2005**, 7(24), 5477-5480). *In situ* deprotection of the Boc group of **3** in acid condition, followed by the coupling with the activated maleimide derivative **4**, called Mal-OSuc (ref.: 63179 from Aldrich), provides **Biotin-EO<sub>2</sub>-Mal**. The experimental preparation of **Biotin-EO<sub>2</sub>-Mal** is described below.

Compound **3** (329.6 mg, 0.695 mmoles) is dissolved in 5mL of aqueous HCl solution (2.5M) leading to a slightly trouble solution. This mixture is stirred three hours at room temperature and freeze-dried, and thus used without further purification. This resulting white solid (261.1 mg, 0.695 mmoles) is diluted in a mixture DMF (11 mL) / NEt<sub>3</sub> (0.2 mL) and stirred 30 minutes at room temperature. Then, solid portions of Mal-OSuc **4** (1.2 equiv., 222.29 mg, 0.835 mmoles) are added into the reaction mixture and let stir 24 hours. Organic solvents are removed under reduced pressure leading to a yellow oil as residue. Flash chromatography on silica gel (150g, Silica gel 60-200µm from VWR Chemicals, ref.: 84893.290) with Acetonitrile/H<sub>2</sub>O 8/2 including 1% of acetic acid as eluent allows to isolate 302,7 mg of a white solid corresponding to **Biotin-EO<sub>2</sub>-Mal** (88% yield). R<sub>f</sub> (SiO<sub>2</sub>, Acetonitrile/H<sub>2</sub>O 8/2 - 1%AcOH) = 0.79; <sup>1</sup>H NMR (D<sub>2</sub>O, 400MHz): δ(ppm) 6.91 (s, 2H), 4.87 (t, <sup>3</sup>J=<sup>3</sup>J=5Hz, 2H), 4.64 (ddd, <sup>3</sup>J<sub>cis</sub>=5.0Hz, <sup>3</sup>J=4.5Hz, <sup>3</sup>J=0.5Hz, 1H), 4.46 (dd, <sup>3</sup>J<sub>cis</sub>=5.0Hz, <sup>3</sup>J=4.5Hz, 1H), 3.84 (t, <sup>3</sup>J=<sup>3</sup>J=6Hz, 2H), 3.78 (m, 1H), 3.68 (broad s, 4H), 3.66 (t, <sup>3</sup>J=<sup>3</sup>J=5.5Hz, 2H), 3.60 (t, <sup>3</sup>J=<sup>3</sup>J=5.5Hz, 2H), 3.43 (t, <sup>3</sup>J=<sup>3</sup>J=5.5Hz, 2H), 3.36 (t, <sup>3</sup>J=<sup>3</sup>J=5.5Hz, 2H), 3.02 (dd, <sup>2</sup>J=13Hz, <sup>3</sup>J<sub>trans</sub>=5Hz, 1H), 2.82 (d, <sup>3</sup>J=13Hz, 1H), 2.56 (t, <sup>3</sup>J=<sup>3</sup>J=6.5Hz, 2H), 2.31(t, <sup>3</sup>J=<sup>3</sup>J=7.0Hz, 2H), 1.68 (m, 4H), 1.45 (m, 2H).
